# Supplementary material for: Sequence Analysis of New Tuf Molecular Types of ‘Candidatus Phytoplasma Solani’ in Iranian Vineyards
Source: MDPI journal article supplement (doi:10.3390/pathogens9060508), 2020-06-24
Supplement: s1 [file s1]

# Sequence Analysis of New *Tuf* Molecular Types of ‘*Candidatus* Phytoplasma Solani’ in Iranian Vineyards

Elham Jamshidi <sup>1</sup>, Sergio Murolo <sup>1</sup>, Mohammad Salehi <sup>2</sup> and Gianfranco Romanazzi <sup>1,\*</sup>

<sup>1</sup> Department of Agricultural, Food and Environmental Sciences, Marche Polytechnic University, 60131 Ancona, Italy; e.jamshidi@univpm.it (E.J.); s.murolo@univpm.it (S.M.)

<sup>2</sup> Plant Protection Research Department, Fars Agricultural and Natural Resources Research and Education Centre, AREEO, Zarghan 617-71555, Iran; m.salehiabarghuie@areeo.ac.ir

\* Correspondence: g.romanazzi@univpm.it; Tel.: +39 071 2204336

Received: 22 April 2020; Accepted: 17 June 2020; Published: date

## Supplemental material

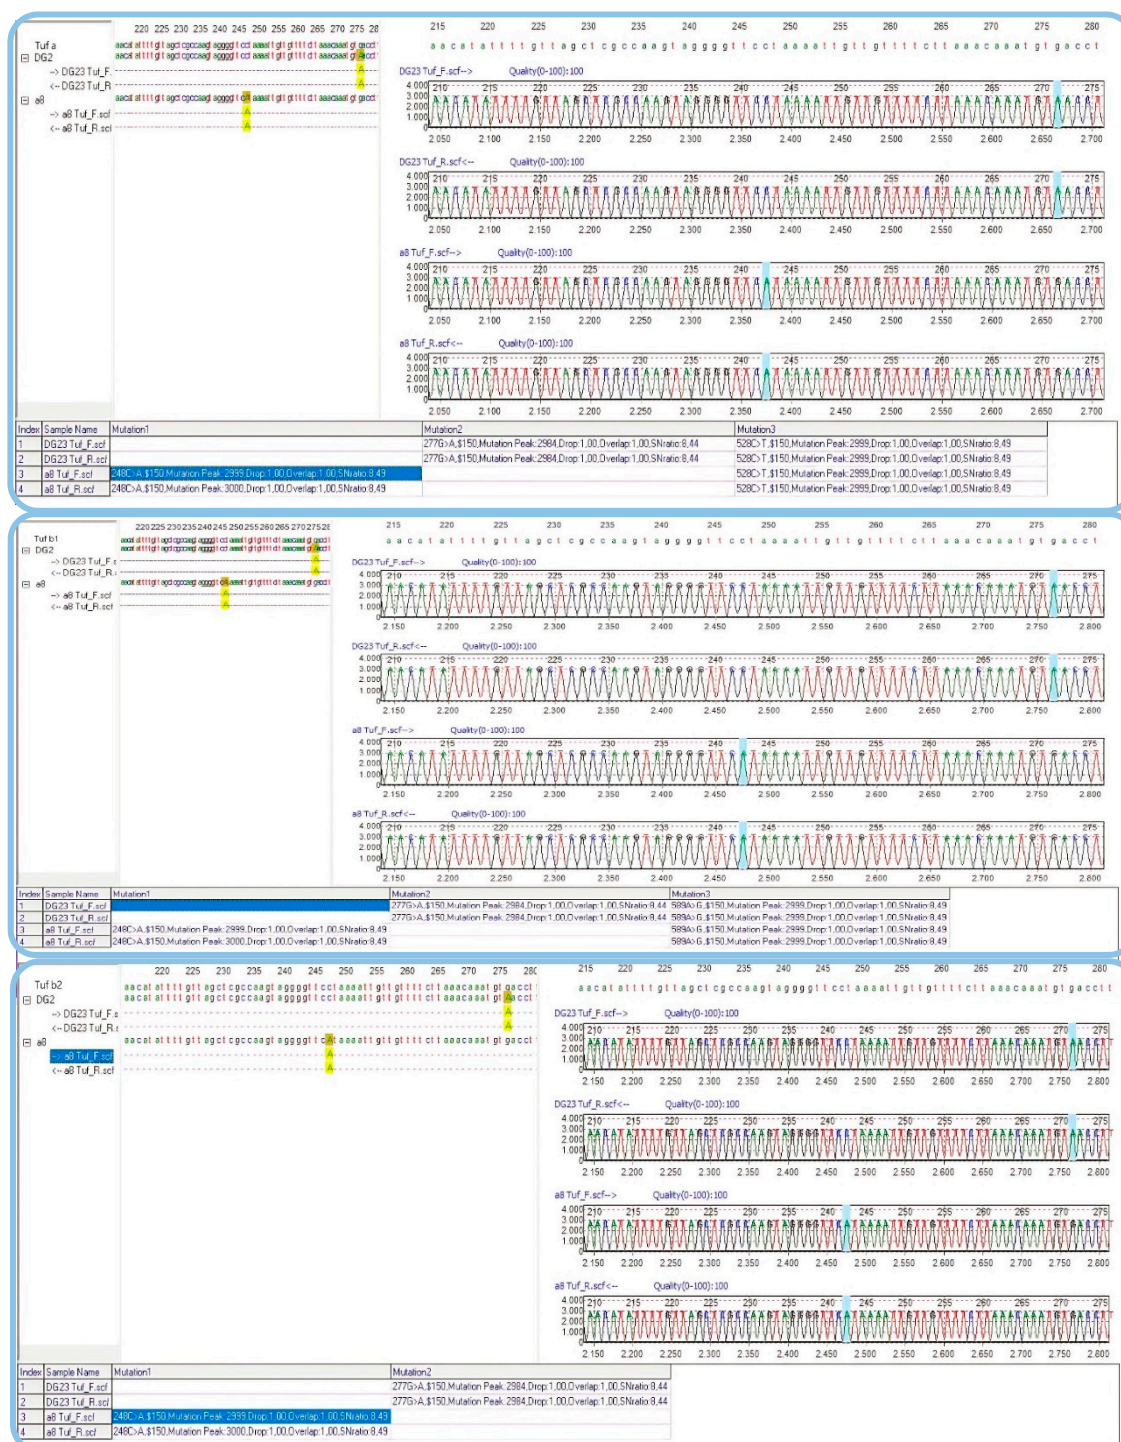

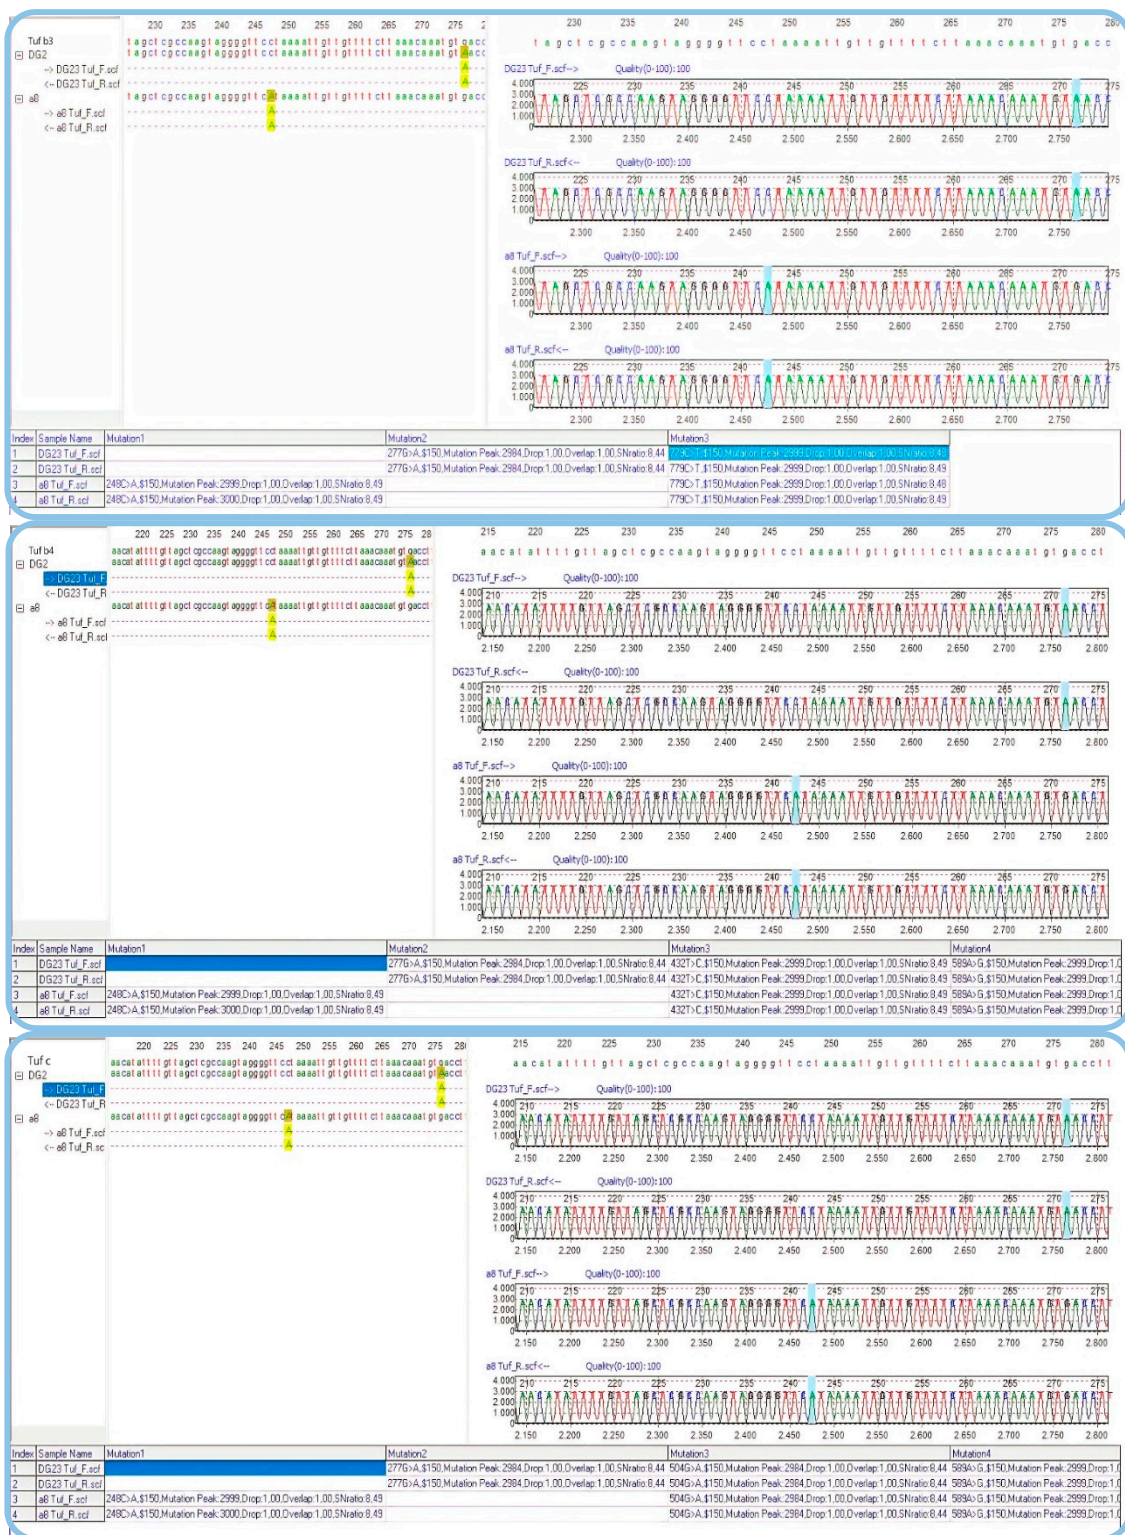

**Figure 1.** Sequence analysis results using Mutation Surveyor V4.0.8, Graphic Analysis display for single nucleotide changes in the a8 and DG23 samples, compared with the reference strains.
